# Supplementary material
Source: bioRxiv or medRxiv preprint supplement (https://www.biorxiv.org/highwire/filestream/45969/field_highwire_adjunct_files/4/154724-5.pdf)

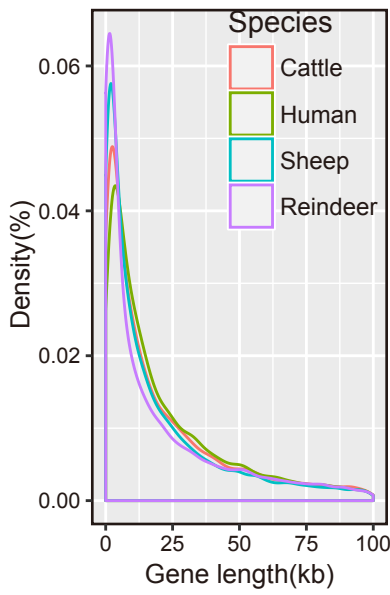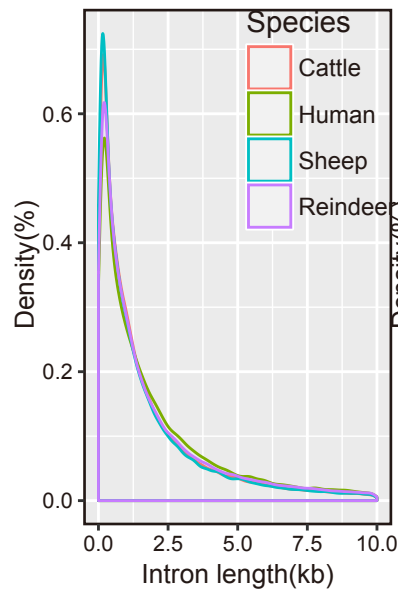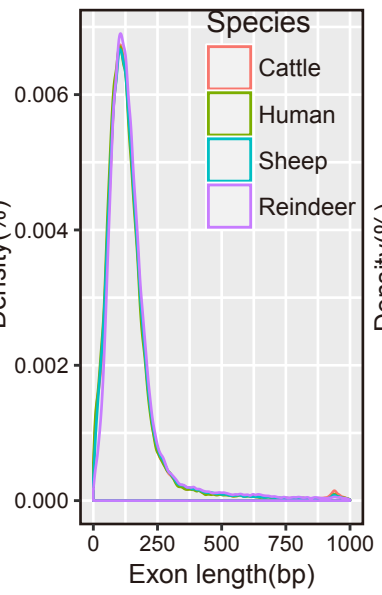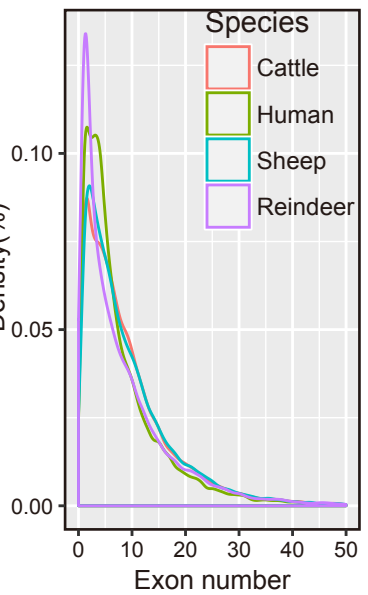

Supplement: Supplementary file [file 154724-5.pdf]
